# Supplementary material for: Short-Term Effects of Kefir-Fermented Milk Consumption on Bone Mineral Density and Bone Metabolism in a Randomized Clinical Trial of Osteoporotic Patients
Source: PLOS journal article supplement (doi:10.1371/journal.pone.0144231), 2015-12-10
Supplement: S2 (10.1371/journal.pone.0144231.s002) [file journal.pone.0144231.s002]

## Kefir on Bone Mineral Density and Bone Metabolism in Osteoporotic Patients

This study has been completed.

|                                              |                                                       |
|----------------------------------------------|-------------------------------------------------------|
| Sponsor:                                     | Ministry of Science and Technology, Taiwan            |
| Collaborators:                               |                                                       |
| Information provided by (Responsible Party): | Min-Yu Tu, Ministry of Science and Technology, Taiwan |
| ClinicalTrials.gov Identifier:               | NCT02361372                                           |

### Purpose

In a controlled, parallel, double-blind intervention study over 6 months, the investigators investigated the effects of kefir-fermented milk (1,600 mg/kg) supplemented with calcium bicarbonate (CaCO<sub>3</sub>, 1,500 mg/kg) and bone metabolism in 40 osteoporosis patients, and compared them with CaCO<sub>3</sub> alone without kefir supplements. Bone turnover markers were measured in fasting blood samples collected before therapy and at 1, 3, and 6 months. BMD values at the spine, total hip, and hip femoral neck were assessed by dual-energy x-ray absorptiometry (DXA) at baseline and at 6 months.

| Condition    | Intervention                          | Phase |
|--------------|---------------------------------------|-------|
| Osteoporosis | Placebo<br>CaCO <sub>3</sub><br>Kefir | N/A   |

Study Type: Interventional

Study Design: Treatment, Parallel Assignment, Double Blind (Subject, Investigator), Randomized, Efficacy Study

Official Title: Short-term Effect of Kefir-fermented Milk Consumption on Bone Mineral Density and Bone Metabolism in Osteoporotic Patients

Further study details as provided by Min-Yu Tu, Ministry of Science and Technology, Taiwan:

Primary Outcome Measure:

- bone mineral density and bone regeneration [Time Frame: 3 months] [Designated as safety issue: Yes]

Enrollment: 69

Study Start Date: May 2010

Primary Completion Date: January 2012

Study Completion Date: January 2012

| Arms                                                                                                              | Assigned Interventions            |
|-------------------------------------------------------------------------------------------------------------------|-----------------------------------|
| Experimental: Kefir and CaCO <sub>3</sub><br>Kefir were administered 1,600 mg kefir-fermented milk per day and an | Kefir<br>Kefir daily for 6 months |

| Arms                                                                                                              | Assigned Interventions                                                                                 |
|-------------------------------------------------------------------------------------------------------------------|--------------------------------------------------------------------------------------------------------|
| accompanying supplement of 1,500 mg CaCO <sub>3</sub> for 6 months                                                |                                                                                                        |
| Placebo Comparator: Placebo and CaCO <sub>3</sub><br>Placebo and 1,500 mg of CaCO <sub>3</sub> daily for 6 months | Placebo<br>Placebo daily for 6 months<br><br>CaCO <sub>3</sub><br>CaCO <sub>3</sub> daily for 6 months |

## Eligibility

Ages Eligible for Study: 55 Years to 70 Years

Genders Eligible for Study: Both

Accepts Healthy Volunteers: Yes

### Criteria

Inclusion Criteria:

- Clinical diagnosis of osteoporosis patients

Exclusion Criteria:

- Any previous use of parathyroid hormone or sodium fluoride, use of anabolic steroids or growth hormone within 6 months before trial entry or oral or intravenous systemic corticosteroids within 12 months, and any previous use of strontium.

## More Information

Responsible Party: Min-Yu Tu, Ministry of Science and Technology, Ministry of Science and Technology, Taiwan

Study ID Numbers: NSC-99-2324-B-005-017-CC1

Health Authority: Taiwan: National Science Council

---

U.S. National Library of Medicine | U.S. National Institutes of Health | U.S. Department of Health & Human Services
